# Supplementary material
Source: PubMed Central journal article supplement (PMC7768775)
Supplement: pnas.2009977117.sd01.pdf [file pnas.2009977117.sd01.pdf]

# Supporting Information Dataset 1

## Development and validation of a potent and specific inhibitor for the CLC-2 chloride channel

Anna K. Koster<sup>a,b</sup>, Austin L. Reese<sup>c</sup>, Yuri Kuryshev<sup>d</sup>, Xianlan Wen<sup>b</sup>, Keri A. McKiernan<sup>a</sup>, Erin E. Gray<sup>a</sup>, Caiyun Wu<sup>d</sup>, John R. Huguenard<sup>c\*</sup>, Merritt Maduke<sup>b\*</sup>, J. Du Bois<sup>a\*</sup>

<sup>a</sup>Department of Chemistry, Stanford University, Stanford, CA 94305, USA

<sup>b</sup>Department of Molecular & Cellular Physiology, Stanford University School of Medicine, Stanford, CA 94305, USA

<sup>c</sup>Department of Neurology & Neurological Sciences, Stanford University School of Medicine, Stanford, CA, USA

<sup>d</sup>Charles River Laboratories, Cleveland, OH 44128, USA

\*Corresponding Authors: Justin Du Bois, [jdubois@stanford.edu](mailto:jdubois@stanford.edu); Merritt Maduke, [maduke@stanford.edu](mailto:maduke@stanford.edu); John R. Huguenard [john.huguenard@stanford.edu](mailto:john.huguenard@stanford.edu)

### Dataset 1: Compound library screening results

The percent inhibition of current at 30  $\mu$ M was determined for each compound in the ENZO Life Sciences SCREEN-WELL® FDA-approved drug library, v. 2.0 (Product # BML-2843-0100). Compounds were screened against human CLC-2 stably expressed in CHO cells. Values were acquired on  $n = 2$  cells using the IonWorks™ Barracuda patch clamp electrophysiology system (see *IonWorks™ Barracuda (IWB) electrophysiology recording conditions* in **Materials and Methods**). Both values were reported for block of peak current at  $-120$  mV. If a compound elicited an increase in peak current instead of inhibition, values are reported as a negative percentage. Entries labeled as 'VEHICLE' represent controls in which 0.3% DMSO in recording solution was applied between measurements ( $n = 28$ ,  $6 \pm 4\%$ ). ND = not determined.

**Dataset 1, Table 1.** Automated patch-clamp screen of ENZO library at 30  $\mu$ M against human CLC-2.

| Entry | Compound                          | %<br>(n = 1) | %<br>(n = 2) | Entry | Compound                | %<br>(n = 1) | %<br>(n = 2) |
|-------|-----------------------------------|--------------|--------------|-------|-------------------------|--------------|--------------|
| 1     | Clindamycin-HCl                   | 6.4          | 17.2         | 401   | Ambrisentan             | 9.1          | 7.2          |
| 2     | Felbamate                         | 9.4          | 11.7         | 402   | Amcinonide              | 3.1          | 5.7          |
| 3     | Cyclosporine A                    | 10.7         | 16.8         | 403   | Amikacin Disulfate      | 11.7         | 10.1         |
| 4     | Donepezil-HCl                     | 13.5         | -17.1        | 404   | Aminocaproic Acid       | 8.3          | 9.8          |
| 5     | Lincomycin-HCl                    | 9.1          | 14.6         | 405   | Aminohippurate-Na       | 4.6          | 5.5          |
| 6     | Mycophenolic Acid                 | 10.7         | 15.9         | 406   | Aminolevulinic Acid-HCl | 1.3          | 12.3         |
| 7     | Sirolimus<br>(Rapamycin)          | 11.1         | 12.7         | 407   | Amlexanox               | 6.8          | -11.3        |
| 8     | Spectinomycin-HCl<br>Pentahydrate | 13.0         | 10.1         | 408   | Amphotericin B          | 7.5          | 1.7          |
| 9     | Amiodarone-HCl                    | 7.8          | 11.9         | 409   | Arsenic Trioxide        | 3.9          | ND           |
| 10    | Nicardipine-HCl                   | 10.6         | 8.5          | 410   | Artemether              | -5.8         | 2.3          |
| 11    | Pimozide                          | 2.7          | 8.7          | 411   | Articaine-HCl           | 13.0         | 3.7          |
| 12    | Loperamide-HCl                    | 14.4         | -13.6        | 412   | L-Ascorbic Acid         | 5.3          | 8.4          |
| 13    | Tolbutamide                       | 28.8         | 5.0          | 413   | Asenapine Maleate       | 15.7         | 1.2          |

|    |                                 |      |      |     |                                |       |       |
|----|---------------------------------|------|------|-----|--------------------------------|-------|-------|
| 14 | Glipizide                       | 14.2 | 11.1 | 414 | Atomoxetine-HCl                | 2.3   | 5.5   |
| 15 | Phentolamine-HCl                | 4.2  | 8.2  | 415 | Atorvastatin Calcium           | 0.4   | 8.1   |
| 16 | Quinine-HCl·H <sub>2</sub> O    | 15.1 | -6.6 | 416 | Azacitidine                    | -1.0  | 8.2   |
| 17 | Propafenone-HCl                 | 7.6  | 9.2  | 417 | Azelaic Acid                   | 6.7   | 6.9   |
| 18 | Phenytoin                       | 12.6 | 10.8 | 418 | Azelastine-HCl                 | -2.1  | -1.7  |
| 19 | Procainamide-HCl                | 7.4  | 13.2 | 419 | Bacitracin                     | 0.1   | -0.8  |
| 20 | Lidocaine-HCl·H <sub>2</sub> O  | 12.3 | 12.2 | 420 | Baclofen                       | 0.9   | -0.5  |
| 21 | Flecainide Acetate              | 11.8 | 13.7 | 421 | Balsalazide                    | 4.7   | 10.6  |
| 22 | Rosiglitazone                   | 12.9 | 14.0 | 422 | Beclomethasone<br>Dipropionate | 1.6   | 4.2   |
| 23 | Amantadine-HCl                  | 8.5  | 11.6 | 423 | Benazepril-HCl                 | 6.6   | 1.3   |
| 24 | Prazosin-HCl                    | 13.3 | 11.7 | 424 | Bendamustine-HCl               | 7.0   | 5.0   |
| 25 | Clonidine-HCl                   | 10.9 | 14.0 | 425 | Bendroflumethiazide            | 13.2  | 8.0   |
| 26 | Guanabenz Acetate               | 14.9 | 31.3 | 426 | Benzotropine Mesylate          | -4.6  | -5.8  |
| 27 | Dihydroergotamine<br>Mesylate   | 19.8 | 11.2 | 427 | Betaine                        | 4.6   | 3.5   |
| 28 | Emtricitabine                   | 9.6  | 12.9 | 428 | Bethanechol Chloride           | 4.9   | 7.7   |
| 29 | Betaxolol-HCl                   | 12.9 | 9.7  | 429 | Bimatoprost                    | 4.2   | 2.9   |
| 30 | Caffeine                        | 13.9 | 11.2 | 430 | Biperiden-HCl                  | -48.8 | -41.9 |
| 31 | (S)-Timolol Maleate             | 6.0  | 9.4  | 431 | Bisoprolol Fumarate            | 6.7   | 5.1   |
| 32 | Salbutamol<br>Hemisulfate       | 12.4 | 10.8 | 432 | Brimonidine                    | 4.8   | 4.4   |
| 33 | Pindolol                        | 11.4 | 14.6 | 433 | Bromfenac                      | 2.0   | 1.9   |
| 34 | Dobutamine-HCl                  | 13.3 | 12.5 | 434 | Brompheniramine<br>Maleate     | 6.5   | 3.1   |
| 35 | Sotalol-HCl                     | 10.2 | 11.0 | 435 | Budesonide                     | 4.8   | 4.2   |
| 36 | Maprotiline-HCl                 | 11.9 | 13.6 | 436 | Bupropion                      | 1.8   | 2.0   |
| 37 | Pilocarpine-HCl                 | 8.2  | 9.2  | 437 | Busulfan                       | 4.0   | 3.8   |
| 38 | Ipratropium·Br                  | 9.3  | 13.4 | 438 | Butorphanol-(+)-<br>Tartrate   | -33.2 | -23.1 |
| 39 | Tropicamide                     | 14.0 | 12.6 | 439 | Capreomycin<br>Disulfate       | 8.8   | 6.8   |
| 40 | Pancuronium·2Br                 | 9.9  | 6.9  | 440 | Carbinoxamine<br>Maleate       | 4.1   | -0.1  |
| 41 | Ivermectin                      | 13.5 | 15.3 | 441 | Carglumic Acid                 | 11.6  | 4.6   |
| 42 | Haloperidol                     | 14.5 | 12.4 | 442 | VEHICLE                        | -5.5  | -3.6  |
| 43 | Cimetidine                      | 10.0 | 15.2 | 443 | Carmustine                     | 8.4   | -2.3  |
| 44 | Zonisamide                      | 8.8  | 17.3 | 444 | Cefaclor                       | 5.2   | 5.1   |
| 45 | Zoledronic Acid<br>Monohydrate  | 14.0 | 15.5 | 445 | Cefadroxil                     | -4.3  | -4.8  |
| 46 | Naltrexone-HCl                  | 1.0  | 0.5  | 446 | Cefazolin·Na                   | 8.4   | 6.9   |
| 47 | Zolmitriptan                    | 10.7 | 21.1 | 447 | Cefdinir                       | -0.5  | 4.1   |
| 48 | Memantine-HCl                   | 6.3  | 8.0  | 448 | Cefditoren Pivoxil             | 7.1   | 2.6   |
| 49 | Riluzole-HCl                    | 20.1 | 24.2 | 449 | Cefixime                       | 4.6   | 3.8   |
| 50 | Propofol                        | 9.3  | 8.4  | 450 | Cefotetan Disodium             | 6.3   | 0.8   |
| 51 | Aminophylline                   | 14.6 | 11.8 | 451 | Cefoxitin·Na                   | 10.8  | 5.8   |
| 52 | Nateglinide                     | 17.0 | 11.6 | 452 | Cefpodoxime Proxetil           | 2.0   | 1.3   |
| 53 | (±)<br>Isoproterenol-HCl        | 10.3 | 12.9 | 453 | Cefprozil                      | 9.0   | -2.6  |
| 54 | Acetylcholine<br>Chloride       | 1.9  | 15.2 | 454 | Ceftibuten                     | 1.5   | 7.5   |
| 55 | Atropine Sulfate<br>Monohydrate | 10.6 | 14.0 | 455 | Ceftizoxim·Na                  | 8.4   | 3.0   |
| 56 | Apomorphine-HCl<br>Hemihydrate  | 16.0 | 17.6 | 456 | Ceftriaxone·Na                 | 2.9   | 5.1   |

|    |                                       |      |      |     |                                   |       |       |
|----|---------------------------------------|------|------|-----|-----------------------------------|-------|-------|
| 57 | Chlorpromazine-HCl                    | -2.6 | 1.7  | 457 | Cefuroxime Axetil                 | 5.5   | -1.7  |
| 58 | Fluphenazine-HCl                      | 15.9 | 12.7 | 458 | Cefuroxime-Na                     | 7.2   | 3.4   |
| 59 | Risperidone                           | 11.7 | 16.1 | 459 | Cephalexin-H <sub>2</sub> O       | 3.5   | -3.7  |
| 60 | Diphenhydramine-HCl                   | 13.7 | 5.7  | 460 | Chenodiol (Chenodeoxycholic Acid) | 9.3   | 8.4   |
| 61 | Promethazine-HCl                      | 13.3 | 2.1  | 461 | VEHICLE                           | -7.9  | -3.3  |
| 62 | Ranitidine-HCl                        | 18.7 | 14.1 | 462 | Chlorhexidine Dihydrochloride     | -20.0 | -18.2 |
| 63 | L-(-)-Epinephrine-(+)-Bitartrate      | 7.6  | 9.3  | 463 | Chlorothiazide                    | 5.4   | -1.1  |
| 64 | Norepinephrine Bitartrate Monohydrate | 13.9 | 12.0 | 464 | Chlorpropamide                    | 1.0   | 9.5   |
| 65 | Quetiapine Fumarate                   | 7.3  | 13.3 | 465 | Chlorthalidone                    | 18.8  | 9.0   |
| 66 | Imipramine-HCl                        | 1.3  | -2.3 | 466 | Chlorzoxazone                     | 15.8  | 15.6  |
| 67 | Amoxapine                             | 24.6 | 26.4 | 467 | Ciclesonide                       | 10.1  | 10.1  |
| 68 | Metoclopramide-HCl                    | 12.9 | 10.6 | 468 | Ciclopirox                        | 1.0   | -6.9  |
| 69 | Nalbuphine-HCl Dihydrate              | 12.7 | 10.1 | 469 | Cidofovir                         | -10.5 | -7.6  |
| 70 | Carbachol (Carbamylcholine) Chloride  | 14.1 | 10.0 | 470 | Cilostazol                        | 4.0   | 8.0   |
| 71 | Famotidine                            | 14.3 | 7.9  | 471 | Cinacalcet-HCl                    | 6.1   | 8.7   |
| 72 | Isoniazid                             | 14.3 | 12.8 | 472 | Cisatracurium Besylate            | 5.0   | 12.2  |
| 73 | Ticlopidine-HCl                       | 12.7 | 11.2 | 473 | Cisplatin                         | 67.5  | 64.7  |
| 74 | Clemastine Fumarate                   | -3.5 | -4.0 | 474 | Cladribine                        | 18.6  | 12.0  |
| 75 | Vardenafil                            | 9.8  | 13.0 | 475 | Clavulanate Potassium             | 4.6   | 15.6  |
| 76 | Linezolid                             | ND   | 6.8  | 476 | Clobazam                          | 4.3   | 13.7  |
| 77 | Docetaxel (Taxotere)                  | 8.9  | 11.0 | 477 | Clofazimine                       | 8.9   | 17.9  |
| 78 | Olopatadine                           | 14.5 | 14.4 | 478 | Clomipramine-HCl                  | -8.3  | -13.2 |
| 79 | Tolcapone                             | 26.7 | 23.3 | 479 | Clonazepam                        | -2.0  | 10.2  |
| 80 | Olmestartan                           | 12.7 | 11.9 | 480 | Clotrimazole                      | -19.9 | -13.8 |
| 81 | Nisoldipine                           | 8.9  | 3.9  | 481 | Cloxacillin-Na                    | 6.7   | 5.5   |
| 82 | Olanzapine                            | 55.6 | 53.9 | 482 | Colchicine                        | 9.7   | 6.6   |
| 83 | Lovastatin                            | 7.3  | -1.8 | 483 | Colistimethate-Na                 | 7.7   | 11.3  |
| 84 | Lamotrigine                           | 9.8  | 13.7 | 484 | Colistin Sulfate                  | 10.2  | 28.9  |
| 85 | Azathioprine                          | 4.9  | 11.1 | 485 | Cortisone Acetate                 | 6.9   | 9.9   |
| 86 | Sildenafil Citrate                    | 8.3  | 5.3  | 486 | Cyclobenzaprine-HCl               | -5.9  | -3.9  |
| 87 | Atovaquone                            | 9.4  | 5.6  | 487 | Cyclopentolate                    | 4.0   | 4.7   |
| 88 | Sertaconazole                         | 9.1  | 7.9  | 488 | Cycloserine                       | 9.3   | 6.6   |
| 89 | Cefepime-HCl Hydrate                  | 16.5 | 6.4  | 489 | Cysteamine-HCl                    | 10.5  | 9.9   |
| 90 | Aripiprazole                          | 17.7 | 8.3  | 490 | Dactinomycin (Actinomycin D)      | 12.4  | 12.2  |
| 91 | Candesartan                           | 12.1 | 12.6 | 491 | Dalfampridine (4-Aminopyridine)   | 4.6   | 8.9   |
| 92 | Butenafine-HCl                        | 5.1  | 7.1  | 492 | Dantrolene-Na                     | 5.5   | 0.9   |
| 93 | Dorzolamide-HCl                       | 9.6  | 10.0 | 493 | Dapsone                           | -0.2  | 3.1   |
| 94 | Escitalopram                          | 22.7 | 24.7 | 494 | Daptomycin                        | -3.5  | 9.9   |

|     |                                     |      |      |     |                                  |       |       |
|-----|-------------------------------------|------|------|-----|----------------------------------|-------|-------|
| 95  | Eprosartan Mesylate                 | 10.3 | 8.8  | 495 | Darifenacin-HBr                  | 4.3   | 17.9  |
| 96  | Entacapone                          | 4.8  | 8.7  | 496 | Darunavir                        | 9.8   | 12.8  |
| 97  | Bleomycin Sulfate                   | 3.5  | 10.8 | 497 | Dasatinib                        | 8.3   | 15.2  |
| 98  | Guanfacine-HCl                      | 12.3 | 9.5  | 498 | Decitabine                       | 1.6   | -2.3  |
| 99  | Tizanidine-HCl                      | 17.5 | 5.8  | 499 | Deferasirox                      | 5.1   | 0.0   |
| 100 | Carvedilol                          | 8.1  | 11.9 | 500 | Deferoxamine Mesylate            | 4.6   | 1.9   |
| 101 | Flumazenil                          | 14.0 | 9.1  | 501 | Demeclocycline-HCl               | 11.4  | 11.5  |
| 102 | Gefitinib                           | 17.0 | 14.5 | 502 | Desipramine-HCl                  | 3.3   | 7.3   |
| 103 | Imatinib Mesylate                   | 6.9  | 9.9  | 503 | Desogestrel                      | 6.0   | 5.3   |
| 104 | Idarubicin-HCl                      | 3.9  | -1.9 | 504 | Desonide                         | 11.0  | 11.5  |
| 105 | Montelukast-Na                      | 3.5  | 9.8  | 505 | Desoximetasone                   | 8.3   | 14.8  |
| 106 | Exemestane                          | 2.9  | 27.3 | 506 | Desvenlafaxine Succinate Hydrate | 10.4  | 11.2  |
| 107 | Dinoprostone                        | 11.1 | 9.2  | 507 | Dexchlorpheniramine Maleate      | 3.1   | 9.0   |
| 108 | Metformin-HCl                       | 6.5  | 13.7 | 508 | Dexmedetomidine-HCl              | -0.7  | 8.6   |
| 109 | Anagrelide                          | 10.4 | 4.6  | 509 | VEHICLE                          | -3.8  | -0.8  |
| 110 | Dofetilide                          | 11.1 | 6.1  | 510 | Dexrazoxane                      | 2.4   | 11.5  |
| 111 | Erlotinib                           | 14.0 | 10.5 | 511 | Diatrizoate Meglumine            | 4.2   | 13.0  |
| 112 | Tacrine-HCl                         | 10.7 | 13.5 | 512 | Diazepam                         | 4.8   | 7.4   |
| 113 | Galantamine-HBr                     | 8.3  | 11.9 | 513 | Dicloxacillin-Na Monohydrate     | 5.1   | 7.1   |
| 114 | Amiloride-HCl·2H <sub>2</sub> O     | 11.1 | 11.4 | 514 | Dicyclomine-HCl                  | -19.1 | -16.5 |
| 115 | Amlodipine                          | 13.7 | 11.6 | 515 | Dienogest                        | 8.7   | 12.4  |
| 116 | Diltiazem-HCl                       | 4.8  | 13.3 | 516 | VEHICLE                          | 0.0   | -8.4  |
| 117 | Nifedipine                          | 9.1  | 10.0 | 517 | Difluprednate                    | 3.0   | 1.6   |
| 118 | Nimodipine                          | -8.6 | 3.5  | 518 | Digoxin                          | 10.0  | 8.6   |
| 119 | Verapamil-HCl                       | 7.7  | 12.0 | 519 | Dimenhydrinate                   | 5.6   | 3.9   |
| 120 | Gabapentin                          | 6.5  | 10.4 | 520 | Disopyramide                     | 10.8  | 9.9   |
| 121 | Felodipine                          | 10.6 | 13.2 | 521 | Dopamine-HCl                     | 15.5  | 8.1   |
| 122 | Phenoxybenzamine-HCl                | 11.8 | 12.9 | 522 | Doripenem                        | 7.2   | 14.1  |
| 123 | Trifluoperazine-HCl                 | 8.1  | 7.5  | 523 | Doxapram-HCl·H <sub>2</sub> O    | 6.2   | 6.7   |
| 124 | Latanoprost                         | 9.4  | 5.4  | 524 | Doxepin-HCl                      | 0.8   | -1.1  |
| 125 | Alfuzosin                           | 9.8  | 17.2 | 525 | Droperidol                       | 10.0  | 13.6  |
| 126 | Bromocriptine Mesylate              | 10.9 | 14.7 | 526 | Drospirenone                     | 13.8  | 11.5  |
| 127 | Clozapine                           | 62.3 | 60.0 | 527 | Duloxetine-HCl                   | 6.3   | 0.5   |
| 128 | Acitretin                           | 4.9  | 2.3  | 528 | Dutasteride                      | 4.3   | 2.8   |
| 129 | Calcitriol                          | 10.2 | 9.9  | 529 | Dyphylline                       | 8.3   | 7.0   |
| 130 | Ketoconazole                        | 0.2  | 0.9  | 530 | Econazole Nitrate                | -7.7  | -0.6  |
| 131 | Cromolyn-Na (Disodium Cromoglycate) | 10.8 | 14.1 | 531 | VEHICLE                          | -5.6  | -5.2  |
| 132 | Capsaicin                           | 12.6 | -4.9 | 532 | Eflornithine-HCl                 | 12.0  | 8.5   |
| 133 | Dexamethasone                       | 10.4 | 13.9 | 533 | Epinastine-HCl                   | 7.0   | 11.5  |
| 134 | Dipyridamole                        | 6.0  | 11.2 | 534 | Epirubicin-HCl                   | -4.2  | -0.8  |
| 135 | Ethacrynic Acid                     | 13.3 | 16.6 | 535 | Eplerenone                       | 8.5   | 8.0   |
| 136 | Indomethacin                        | -6.1 | 10.2 | 536 | Eptifibatide                     | 8.4   | 8.5   |
| 137 | Naproxen                            | 11.1 | 14.6 | 537 | Erythromycin                     | 8.5   | 5.9   |

|     |                             |       |       |     |                              |       |       |
|-----|-----------------------------|-------|-------|-----|------------------------------|-------|-------|
| 138 | Ibuprofen                   | 9.1   | 6.4   | 538 | Estramustine Phosphate·Na    | 6.4   | 12.9  |
| 139 | Bumetanide                  | 11.0  | 11.6  | 539 | Estropipate                  | 9.4   | 8.8   |
| 140 | Neomycin Sulfate            | 5.5   | 10.2  | 540 | Eszopiclone                  | 6.3   | 4.4   |
| 141 | Auranofin                   | 8.1   | 7.6   | 541 | Ethambutol Dihydrochloride   | 5.7   | 6.5   |
| 142 | Captopril                   | 7.4   | 10.4  | 542 | VEHICLE                      | -5.3  | -3.9  |
| 143 | Tranlycypromine Hemisulfate | 13.2  | 10.8  | 543 | Ethinyl Estradiol            | 3.6   | -0.5  |
| 144 | Piroxicam                   | 22.2  | 19.4  | 544 | Ethionamide                  | 4.8   | 6.3   |
| 145 | Moxifloxacin·HCl            | 8.8   | 11.6  | 545 | Ethosuximide                 | 3.6   | 11.2  |
| 146 | Carbidopa                   | 12.5  | 13.1  | 546 | Etodolac                     | 5.2   | 7.8   |
| 147 | Ketoprofen                  | 1.9   | 14.1  | 547 | Etomidate                    | 7.9   | 10.7  |
| 148 | Meloxicam                   | 21.2  | 23.4  | 548 | Etonogestrel                 | 0.0   | 5.6   |
| 149 | Terbinafine·HCl             | 8.2   | 8.3   | 549 | Everolimus                   | 6.4   | 8.9   |
| 150 | Sodium Phenylbutyrate       | 9.6   | 9.2   | 550 | Ezetimibe                    | -3.5  | 5.9   |
| 151 | Simvastatin                 | 6.5   | 10.5  | 551 | Febuxostat                   | -1.2  | 5.7   |
| 152 | Goserelin Acetate           | 0.4   | 4.8   | 552 | Fexofenadine·HCl             | 3.9   | 5.3   |
| 153 | Raloxifene·HCl              | 14.0  | 12.7  | 553 | Fingolimod                   | 2.2   | 5.0   |
| 154 | Rifampin (Rifampicin)       | 8.9   | 6.6   | 554 | Flavoxate·HCl                | 1.3   | 2.0   |
| 155 | Etoposide                   | 12.8  | 14.3  | 555 | Flucytosine                  | 4.3   | 8.2   |
| 156 | Mitomycin C                 | 10.2  | 10.4  | 556 | Fludarabine Phosphate        | 8.3   | 10.6  |
| 157 | Delavirdine Mesylate        | 7.4   | -2.5  | 557 | Fludrocortisone Acetate      | 9.0   | 10.8  |
| 158 | Daunorubicin·HCl            | 11.4  | 10.4  | 558 | Flunisolide                  | 3.9   | 8.3   |
| 159 | Doxorubicin·HCl             | 8.4   | 15.3  | 559 | Fluocinonide                 | 9.9   | 9.6   |
| 160 | Cetirizine HCl              | 1.4   | 4.3   | 560 | Fluorometholone              | -0.7  | 8.5   |
| 161 | Lapatinib Ditosylate        | 19.0  | 12.0  | 561 | Flurandrenolide              | 4.0   | 6.9   |
| 162 | Pioglitazone·HCl            | 1.6   | 10.8  | 562 | VEHICLE                      | -10.2 | -6.6  |
| 163 | Rivastigmine Tartrate       | -8.5  | 9.2   | 563 | Fluticasone Propionate       | 7.5   | 10.4  |
| 164 | Ergotamine Tartrate         | 12.7  | 14.7  | 564 | Fluvoxamine Maleate          | 3.1   | -0.2  |
| 165 | Sulindac                    | 10.1  | 11.2  | 565 | Fomepizole                   | 5.7   | 10.4  |
| 166 | Valproic Acid               | 13.9  | 14.6  | 566 | Formoterol                   | 6.9   | 9.4   |
| 167 | Calcipotriene               | -48.1 | 14.1  | 567 | Foscarnet·Na                 | 6.3   | 11.7  |
| 168 | Zafirlukast                 | 26.8  | 30.2  | 568 | Fosfomycin Calcium           | 13.7  | 5.5   |
| 169 | Zileuton                    | 6.1   | -15.3 | 569 | Fosphenytoin·Na Pentahydrate | 4.9   | ND    |
| 170 | Bortezomib                  | 10.4  | 7.5   | 570 | Gemifloxacin                 | 2.3   | 8.9   |
| 171 | Diazoxide                   | 10.8  | 17.1  | 571 | Glycopyrrolate Iodide        | 1.8   | 8.2   |
| 172 | Glyburide                   | 4.7   | 14.9  | 572 | Griseofulvin                 | 2.8   | -18.1 |
| 173 | Minoxidil                   | 34.4  | -0.8  | 573 | Guanidine·HCl                | 13.2  | 12.0  |
| 174 | Tolazamide                  | 10.5  | 8.7   | 574 | Halcinonide                  | 4.2   | 8.1   |
| 175 | Bexarotene                  | 7.5   | 12.6  | 575 | Halobetasol Propionate       | 11.5  | 9.1   |
| 176 | Tranexamic Acid             | 15.4  | 12.0  | 576 | Hexachlorophene              | 41.8  | 39.6  |
| 177 | Celecoxib                   | -4.2  | -4.3  | 577 | Homatropine Methylbromide    | 6.3   | 12.8  |
| 178 | Levetiracetam               | 12.4  | 8.3   | 578 | Hydralazine·HCl              | 5.9   | 6.8   |
| 179 | Letrozole                   | 9.2   | 12.2  | 579 | Hydrochlorothiazide          | 10.3  | 7.7   |
| 180 | Anastrozole                 | 11.3  | 12.8  | 580 | Hydroflumethiazide           | 7.8   | 6.5   |

|            |                                                     |      |      |            |                                     |      |      |
|------------|-----------------------------------------------------|------|------|------------|-------------------------------------|------|------|
| <b>181</b> | Bicalutamide                                        | 9.5  | 4.3  | <b>581</b> | Hydroxocobalamin-HCl                | 0.5  | 10.3 |
| <b>182</b> | Clindamycin Palmitate-HCl                           | 19.9 | 21.1 | <b>582</b> | Hydroxychloroquine Sulfate          | 9.9  | 9.1  |
| <b>183</b> | Vorinostat                                          | 9.8  | 10.5 | <b>583</b> | Hydroxyurea                         | 13.2 | 9.4  |
| <b>184</b> | Didanosine                                          | 1.5  | 4.9  | <b>584</b> | Hydroxyzine Dihydrochloride         | -0.1 | -2.1 |
| <b>185</b> | Dolasetron                                          | -2.9 | 16.2 | <b>585</b> | Ibutilide Fumarate                  | 25.1 | 10.9 |
| <b>186</b> | Enalaprilat Maleate                                 | 7.6  | -2.9 | <b>586</b> | Iloperidone                         | 32.6 | 27.1 |
| <b>187</b> | Fluvastatin-Na                                      | 7.5  | 6.0  | <b>587</b> | Indinavir                           | 7.5  | 9.2  |
| <b>188</b> | Fosinopril-Na                                       | 5.2  | 11.1 | <b>588</b> | Irbesartan                          | 26.1 | 29.1 |
| <b>189</b> | Gemcitabine-HCl                                     | 11.3 | 6.4  | <b>589</b> | Irinotecan-HCl                      | 12.3 | 8.2  |
| <b>190</b> | Granisetron-HCl                                     | 12.7 | 8.4  | <b>590</b> | Isocarboxazid                       | 7.6  | 11.5 |
| <b>191</b> | Oxaliplatin                                         | 2.3  | 16.0 | <b>591</b> | Isosorbide Dinitrate                | 7.3  | 12.0 |
| <b>192</b> | Atazanavir                                          | 14.1 | 17.2 | <b>592</b> | Isotretinoin (13-Cis-Retinoic Acid) | 5.2  | 13.0 |
| <b>193</b> | Mycophenolate Mofetil                               | 8.3  | 7.1  | <b>593</b> | Isradipine                          | 2.7  | 4.1  |
| <b>194</b> | Clofarabine                                         | -0.2 | 11.0 | <b>594</b> | Kanamycin Sulfate                   | 5.8  | 9.9  |
| <b>195</b> | Cabergoline                                         | 13.8 | 15.1 | <b>595</b> | Ketorolac Tromethamine              | 9.7  | 11.4 |
| <b>196</b> | Ibandronate-Na Monohydrate                          | 7.2  | 11.1 | <b>596</b> | Labetalol-HCl                       | 9.5  | 8.0  |
| <b>197</b> | Imipenem                                            | 12.6 | 10.5 | <b>597</b> | Lacosamide                          | 8.3  | 8.3  |
| <b>198</b> | Lomustine                                           | ND   | 5.6  | <b>598</b> | Lactulose                           | 6.4  | 11.9 |
| <b>199</b> | Adapalene                                           | 13.4 | 10.4 | <b>599</b> | Lamivudine                          | 10.2 | 7.6  |
| <b>200</b> | Meropenem                                           | 7.2  | 12.3 | <b>600</b> | Lansoprazole                        | 1.3  | 7.0  |
| <b>201</b> | Oseltamivir Phosphate                               | 6.0  | 11.7 | <b>601</b> | Lenalidomide                        | 8.7  | 9.0  |
| <b>202</b> | Pamidronate Disodium Pentahydrate (Pamidronic Acid) | 13.0 | 9.8  | <b>602</b> | Leucovorin Calcium Pentahydrate     | 7.2  | 11.3 |
| <b>203</b> | Pramipexole Dihydrochloride Monohydrate             | 12.4 | 3.7  | <b>603</b> | Levalbuterol-HCl                    | 11.2 | 10.9 |
| <b>204</b> | Triptorelin Acetate                                 | 3.8  | 6.7  | <b>604</b> | Levobunolol-HCl                     | 8.9  | 10.1 |
| <b>205</b> | Risredonic Acid                                     | 13.0 | 12.5 | <b>605</b> | Levocarnitine                       | 8.4  | 8.2  |
| <b>206</b> | Rocuronium Bromide                                  | 10.5 | 12.6 | <b>606</b> | Levocetirizine Dihydrochloride      | 5.1  | 1.2  |
| <b>207</b> | Vinorelbine                                         | 15.7 | 12.6 | <b>607</b> | Levothyroxine-Na                    | 4.5  | 4.9  |
| <b>208</b> | Salmeterol                                          | 5.9  | 5.1  | <b>608</b> | Lindane                             | 14.0 | 13.5 |
| <b>209</b> | Vincristine Sulfate                                 | 12.1 | 8.5  | <b>609</b> | Liothyronine-Na                     | 12.1 | 6.9  |
| <b>210</b> | Aspirin (Acetylsalicylic Acid)                      | 16.0 | 5.2  | <b>610</b> | Lopinavir                           | 4.9  | 0.9  |
| <b>211</b> | Acyclovir (Acycloguanosine) Zovirax                 | 10.9 | 14.1 | <b>611</b> | Lorazepam                           | 14.0 | 9.3  |
| <b>212</b> | Zidovudine (3'-Azido-3'-Deoxythymidine)             | 10.4 | 13.9 | <b>612</b> | Loteprednol Etabonate               | 14.4 | 6.9  |
| <b>213</b> | Allopurinol                                         | 8.6  | 9.5  | <b>613</b> | Loxapine Succinate                  | 2.6  | 1.2  |
| <b>214</b> | Altretamine                                         | 9.9  | 8.2  | <b>614</b> | Mafenide-HCl                        | 7.5  | 7.5  |
| <b>215</b> | Alendronate-Na Trihydrate                           | 13.3 | 12.1 | <b>615</b> | Malathion                           | ND   | 9.8  |
| <b>216</b> | Albendazole                                         | ND   | 8.2  | <b>616</b> | Mannitol                            | 7.7  | 6.4  |

|     |                                    |       |       |     |                                                          |      |      |
|-----|------------------------------------|-------|-------|-----|----------------------------------------------------------|------|------|
| 217 | Sumatriptan Succinate              | 11.5  | 20.0  | 617 | Maraviroc                                                | 8.9  | 6.3  |
| 218 | Amifostine                         | 9.4   | 15.9  | 618 | Mechlorethamine-HCl                                      | 10.9 | 8.6  |
| 219 | 4-Aminosalicylic Acid              | 7.3   | 7.2   | 619 | Meclizine Dihydrochloride                                | 3.4  | 4.2  |
| 220 | Mesalamine (5-Aminosalicylic Acid) | 14.2  | 13.1  | 620 | Meclofenamate-Na                                         | 83.7 | 85.5 |
| 221 | Ampicillin Trihydrate              | 11.8  | -8.2  | 621 | Mefloquine-HCl                                           | -6.6 | -8.7 |
| 222 | (±)-Atenolol                       | 8.2   | 16.6  | 622 | Mepenzolate Bromide                                      | 0.8  | 0.7  |
| 223 | Atracurium Besylate                | 9.7   | 29.3  | 623 | Mepivacaine-HCl                                          | 6.0  | 9.2  |
| 224 | Vinblastine Sulfate                | 31.3  | 18.1  | 624 | Meprobamate                                              | 0.4  | 7.6  |
| 225 | Azithromycin                       | 15.7  | 15.9  | 625 | Mequinol                                                 | 3.2  | 9.5  |
| 226 | Aztreonam                          | 22.8  | 14.0  | 626 | Mercaptopurine Hydrate                                   | 5.4  | 13.2 |
| 227 | Betamethasone                      | 11.4  | 13.7  | 627 | Mesna                                                    | 14.7 | 10.3 |
| 228 | Bisacodyl                          | 12.2  | 7.6   | 628 | Mestranol                                                | 11.8 | -1.6 |
| 229 | Buspirone-HCl                      | 14.3  | 12.3  | 629 | Metaproterenol Hemisulfate (Orciprenaline)               | 7.7  | 6.6  |
| 230 | Carboplatin                        | 16.9  | 15.4  | 630 | Metaraminol Bitartrate                                   | 5.7  | 5.9  |
| 231 | Carbamazepine                      | 14.0  | -17.5 | 631 | Metaxalone                                               | 6.5  | 5.6  |
| 232 | Cefotaxime Acid                    | -1.8  | 12.8  | 632 | Methacholine Chloride                                    | 6.6  | 12.2 |
| 233 | Ceftazidime                        | 2.6   | 9.8   | 633 | Methazolamide                                            | 7.1  | 13.0 |
| 234 | Chloramphenicol                    | 6.1   | 15.1  | 634 | Methenamine Hippurate                                    | 9.7  | 5.8  |
| 235 | Chlorambucil                       | 7.3   | 12.3  | 635 | Methocarbamol                                            | 6.6  | 8.5  |
| 236 | Chlorpheniramine Maleate           | 13.6  | 10.2  | 636 | Methotrexate                                             | 12.0 | 32.6 |
| 237 | Chloroquine Diphosphate            | -2.4  | 16.4  | 637 | Methoxsalen (Xanthotoxin)                                | 15.5 | 9.9  |
| 238 | Thalidomide                        | 11.1  | 11.0  | 638 | Methscopolamine Bromide ((-)-Scopolamine Methyl Bromide) | 12.5 | 10.4 |
| 239 | Ciprofloxacin                      | -13.5 | 12.7  | 639 | Methsuximide                                             | 5.8  | 8.4  |
| 240 | Citalopram-HBr                     | 18.6  | 22.0  | 640 | Methyclothiazide                                         | 16.2 | 16.3 |
| 241 | Clarithromycin                     | 8.1   | 13.9  | 641 | Methyl Aminolevulinate-HCl                               | 9.1  | 8.9  |
| 242 | Clomiphene Citrate                 | 3.8   | 3.2   | 642 | Methylethergonovine Maleate                              | 12.7 | 10.6 |
| 243 | Clopidogrel Hydrogen Sulfate       | 9.7   | 14.0  | 643 | Metolazone                                               | 7.5  | 10.2 |
| 244 | Clobetasol Propionate              | 27.3  | 23.5  | 644 | Metyrapone                                               | 7.0  | 16.8 |
| 245 | Orphenadrine Citrate               | 3.9   | 7.2   | 645 | VEHICLE                                                  | -6.3 | -5.4 |
| 246 | Crotamiton                         | 13.6  | 7.9   | 646 | Mexiletine-HCl                                           | 11.4 | 19.7 |
| 247 | Cyclophosphamide (Free Base)       | 11.6  | 0.9   | 647 | Micafungin                                               | 26.7 | 27.9 |
| 248 | Cytarabine                         | 13.3  | 13.9  | 648 | Miconazole                                               | -2.3 | -0.9 |
| 249 | Dacarbazine                        | 12.8  | 6.4   | 649 | VEHICLE                                                  | -3.8 | -1.1 |
| 250 | Danazol                            | 0.7   | 8.0   | 650 | Midodrine-HCl                                            | 8.4  | 10.0 |
| 251 | Desloratadine                      | 9.2   | 8.4   | 651 | Miglitol                                                 | 14.7 | 9.8  |
| 252 | Dextromethorphan                   | 11.9  | 9.5   | 652 | Milnacipran-HCl                                          | 10.2 | -4.1 |
| 253 | Diclofenac-Na Salt                 | 9.5   | 14.9  | 653 | Mirtazapine                                              | 5.2  | 6.5  |

|            |                                     |       |      |            |                                                    |       |       |
|------------|-------------------------------------|-------|------|------------|----------------------------------------------------|-------|-------|
| <b>254</b> | Zalcitabine (2',3'-Dideoxycytidine) | 10.5  | 17.3 | <b>654</b> | Mitotane                                           | 7.5   | 12.2  |
| <b>255</b> | Diflunisal                          | 24.7  | 27.0 | <b>655</b> | Modafinil                                          | 9.1   | 11.5  |
| <b>256</b> | Disulfiram                          | 15.3  | 4.5  | <b>656</b> | Moexipril-HCl                                      | 8.1   | 9.4   |
| <b>257</b> | Doxazosin Mesylate                  | 14.6  | 14.7 | <b>657</b> | Mometasone Furoate                                 | 17.5  | 12.0  |
| <b>258</b> | Doxycycline Monohydrate             | 7.0   | 7.4  | <b>658</b> | Mupirocin                                          | 8.3   | 8.4   |
| <b>259</b> | Enalapril                           | 9.8   | 10.3 | <b>659</b> | Nadolol                                            | 9.3   | 6.6   |
| <b>260</b> | Esomeprazole Potassium              | 9.6   | 10.6 | <b>660</b> | Nafcillin-Na                                       | 9.2   | 17.5  |
| <b>261</b> | Estradiol                           | 14.3  | 12.1 | <b>661</b> | Naftifine-HCl                                      | 5.4   | 12.5  |
| <b>262</b> | Estrone                             | 13.9  | 11.7 | <b>662</b> | Naratriptan-HCl                                    | 14.2  | 11.2  |
| <b>263</b> | Etidronate Disodium                 | 6.6   | 14.1 | <b>663</b> | Natamycin                                          | 9.0   | 10.7  |
| <b>264</b> | Famciclovir                         | 11.8  | 12.9 | <b>664</b> | Nebivolol-HCl                                      | -22.3 | 4.5   |
| <b>265</b> | Fenoldopam Mesylate                 | 8.9   | 13.6 | <b>665</b> | Nelarabine                                         | 30.3  | 15.2  |
| <b>266</b> | Fenopropfen Calcium                 | 10.2  | ND   | <b>666</b> | Nepafenac                                          | 10.2  | 7.9   |
| <b>267</b> | Fenofibrate                         | 6.8   | 13.5 | <b>667</b> | Nevirapine                                         | 9.9   | 11.5  |
| <b>268</b> | Finasteride                         | 1.2   | 5.1  | <b>668</b> | Niacin (Vitamin B3, Nicotinic Acid And Vitamin Pp) | 6.0   | 9.4   |
| <b>269</b> | Fluorouracil (5-Fluorouracil)       | 13.7  | 10.1 | <b>669</b> | Nicotine                                           | 10.8  | 9.8   |
| <b>270</b> | Flurbiprofen                        | 9.3   | 10.7 | <b>670</b> | Nilotinib                                          | 6.4   | 10.7  |
| <b>271</b> | Amitriptyline-HCl                   | -27.8 | -5.2 | <b>671</b> | Nilutamide                                         | 3.7   | 5.2   |
| <b>272</b> | Floxuridine                         | 12.7  | 13.8 | <b>672</b> | Nitazoxanide                                       | 23.3  | 9.2   |
| <b>273</b> | Fluocinolone Acetonide              | 12.1  | 3.6  | <b>673</b> | Nitisinone                                         | 17.7  | 15.4  |
| <b>274</b> | Flutamide                           | 1.7   | 15.3 | <b>674</b> | Nitrofurantoin                                     | 6.0   | 4.9   |
| <b>275</b> | Fluconazole                         | 12.4  | 11.1 | <b>675</b> | Nizatidine                                         | 11.9  | 15.1  |
| <b>276</b> | Furosemide                          | 13.9  | 2.6  | <b>676</b> | Nortriptyline-HCl                                  | -3.7  | -18.1 |
| <b>277</b> | Ganciclovir                         | 15.0  | 7.4  | <b>677</b> | Olsalazine-Na                                      | 10.3  | -0.9  |
| <b>278</b> | Gatifloxacin                        | 6.6   | 8.5  | <b>678</b> | Orlistat (Tetrahydrolipstatin)                     | 10.0  | 7.3   |
| <b>279</b> | Gentamycin Sulfate                  | 12.9  | 10.2 | <b>679</b> | Oxaprozin                                          | 5.4   | 12.3  |
| <b>280</b> | Gemfibrozil                         | 6.3   | 8.8  | <b>680</b> | Oxazepam                                           | 1.6   | 8.1   |
| <b>281</b> | Glimepiride                         | 11.3  | 6.6  | <b>681</b> | Oxtriphylline                                      | 14.6  | 16.1  |
| <b>282</b> | Hydrocortisone                      | 12.6  | 9.2  | <b>682</b> | Oxybutynin Chloride                                | 8.3   | 9.0   |
| <b>283</b> | Hydrocortisone Acetate              | 9.1   | 11.7 | <b>683</b> | Oxytetracycline-HCl                                | 3.9   | 8.5   |
| <b>284</b> | Idoxuridine                         | 10.8  | 9.6  | <b>684</b> | Paliperidone                                       | 9.5   | 10.7  |
| <b>285</b> | Ifosfamide                          | 6.3   | 9.4  | <b>685</b> | Palonosetron-HCl                                   | 16.9  | 9.0   |
| <b>286</b> | Imiquimod                           | 9.1   | 10.0 | <b>686</b> | Paromomycin Sulfate                                | 9.9   | 3.1   |
| <b>287</b> | Indapamide                          | 11.6  | 8.4  | <b>687</b> | Pazopanib-HCl                                      | 37.4  | ND    |
| <b>288</b> | Itraconazole                        | 10.4  | -0.2 | <b>688</b> | Pemetrexed Disodium                                | 7.8   | 7.7   |
| <b>289</b> | Levonorgestrel                      | 13.2  | 6.2  | <b>689</b> | Pemirolast Potassium                               | 8.8   | 12.1  |
| <b>290</b> | Levofloxacin-HCl                    | 5.6   | 6.7  | <b>690</b> | Penicillamine (D-Penicillamine)                    | -2.0  | 7.3   |
| <b>291</b> | Leflunomide                         | 3.8   | 4.2  | <b>691</b> | Penicillin G Potassium (Benzylpenicillin)          | 7.6   | 8.3   |
| <b>292</b> | Lisinopril-2H <sub>2</sub> O        | 11.0  | 11.5 | <b>692</b> | Pentamidine Isethionate                            | -3.3  | -2.4  |
| <b>293</b> | Loratadine                          | 6.4   | 3.7  | <b>693</b> | Pentostatin                                        | 9.8   | 10.5  |
| <b>294</b> | Losartan Potassium                  | 14.3  | 13.9 | <b>694</b> | Perindopril Erbumine                               | 8.2   | -12.6 |

|            |                                                          |      |       |            |                                |       |       |
|------------|----------------------------------------------------------|------|-------|------------|--------------------------------|-------|-------|
| <b>295</b> | Mebendazole                                              | 9.6  | 6.4   | <b>695</b> | Permethrin                     | 11.5  | 12.7  |
| <b>296</b> | Medroxyprogesterone Acetate                              | 18.8 | 14.9  | <b>696</b> | Perphenazine                   | -9.3  | -8.7  |
| <b>297</b> | Mefenamic Acid                                           | ND   | 12.9  | <b>697</b> | Phenelzine Sulfate             | 6.4   | 14.4  |
| <b>298</b> | Melphalan                                                | 9.3  | 4.9   | <b>698</b> | Phenylephrine                  | 13.1  | 11.1  |
| <b>299</b> | Methyldopa Sesquihydrate (L-A-Methyl-Dopa Sesquihydrate) | 10.8 | 9.3   | <b>699</b> | Phytonadione                   | 12.0  | 15.5  |
| <b>300</b> | Methylprednisolone                                       | 10.1 | 9.7   | <b>700</b> | Pimecrolimus                   | 3.6   | 13.6  |
| <b>301</b> | Metoprolol Tartrate                                      | 14.1 | 10.8  | <b>701</b> | Pitavastatin Calcium           | 14.0  | 10.8  |
| <b>302</b> | Methimazole                                              | 11.7 | 12.1  | <b>702</b> | VEHICLE                        | -6.8  | -4.0  |
| <b>303</b> | Metronidazole                                            | 15.7 | 9.8   | <b>703</b> | Podofilox                      | 6.1   | 11.6  |
| <b>304</b> | Minocycline                                              | 10.3 | 11.2  | <b>704</b> | Posaconazole                   | 8.4   | 10.5  |
| <b>305</b> | Mitoxantrone-HCl                                         | 9.1  | 2.7   | <b>705</b> | Pralidoxime Chloride           | 14.6  | 14.1  |
| <b>306</b> | Paclitaxel (Taxol)                                       | 11.8 | 13.3  | <b>706</b> | Prasugrel                      | 7.2   | 7.5   |
| <b>307</b> | Nabumetone                                               | 11.0 | 3.0   | <b>707</b> | Pravastatin-Na                 | 6.6   | 3.0   |
| <b>308</b> | Naphazoline-HCl                                          | 4.8  | 7.1   | <b>708</b> | Pregabalin                     | -5.5  | -6.9  |
| <b>309</b> | Nefazodone-HCl                                           | 11.3 | -7.5  | <b>709</b> | Prilocaine-HCl                 | 8.1   | 11.2  |
| <b>310</b> | Norethindrone                                            | 11.2 | 7.4   | <b>710</b> | Primidone                      | 8.8   | 14.6  |
| <b>311</b> | Norfloxacin                                              | 6.8  | 12.0  | <b>711</b> | Probenecid                     | 11.5  | 8.2   |
| <b>312</b> | Nystatin                                                 | 18.3 | 18.6  | <b>712</b> | VEHICLE                        | -5.5  | -19.1 |
| <b>313</b> | Ofloxacin                                                | 5.0  | 12.2  | <b>713</b> | Proparacaine-HCl               | 7.5   | 11.6  |
| <b>314</b> | Omeprazole                                               | 9.9  | -2.5  | <b>714</b> | Propylthiouracil               | 8.1   | 10.8  |
| <b>315</b> | Oxcarbazepine                                            | 12.6 | 7.4   | <b>715</b> | Protriptyline-HCl              | 7.6   | 15.9  |
| <b>316</b> | Oxiconazole Nitrate                                      | 4.8  | 0.4   | <b>716</b> | Pyrazinamide                   | 6.8   | 12.6  |
| <b>317</b> | Oxacillin sodium salt monohydrate                        | 13.0 | 17.5  | <b>717</b> | Pyridostigmine Bromide         | -0.3  | 7.7   |
| <b>318</b> | Pantoprazole                                             | 8.4  | 6.6   | <b>718</b> | Pyrimethamine                  | -2.2  | 0.5   |
| <b>319</b> | Paroxetine-HCl                                           | 6.5  | -20.9 | <b>719</b> | Quinidine-HCl-H <sub>2</sub> O | -3.0  | 11.8  |
| <b>320</b> | Penciclovir                                              | 10.6 | 11.7  | <b>720</b> | Rabeprazole-Na                 | 12.1  | 5.3   |
| <b>321</b> | Pentoxifylline                                           | 5.7  | 4.9   | <b>721</b> | Raltegravir                    | 6.0   | 11.0  |
| <b>322</b> | Penicillin V Potassium                                   | -1.8 | 6.1   | <b>722</b> | Ramelteon                      | 7.7   | 10.4  |
| <b>323</b> | Piperacillin                                             | -1.1 | 5.5   | <b>723</b> | Rasagiline Mesylate            | 8.6   | 8.5   |
| <b>324</b> | Prednisolone                                             | 5.0  | 1.5   | <b>724</b> | Regadenoson                    | 4.2   | 5.0   |
| <b>325</b> | Progesterone                                             | 28.5 | 28.6  | <b>725</b> | Repaglinide                    | 5.9   | 14.8  |
| <b>326</b> | Procarbazine-HCl                                         | 8.4  | 6.3   | <b>726</b> | Reserpine                      | 8.3   | 10.6  |
| <b>327</b> | Prednisone                                               | 6.6  | 8.3   | <b>727</b> | Rifabutin                      | 11.0  | -5.5  |
| <b>328</b> | Primaquine Phosphate                                     | ND   | 2.3   | <b>728</b> | Rifapentine                    | 0.4   | 7.4   |
| <b>329</b> | Praziquantel                                             | 2.9  | 9.6   | <b>729</b> | Rifaximin                      | 8.2   | ND    |
| <b>330</b> | Quinapril-HCl                                            | 8.5  | 1.9   | <b>730</b> | Ritonavir                      | -4.3  | 13.4  |
| <b>331</b> | Ranolazine-2HCl                                          | 4.8  | 8.1   | <b>731</b> | Rizatriptan Benzoate           | 10.7  | 12.5  |
| <b>332</b> | Ramipril                                                 | 6.3  | -1.1  | <b>732</b> | Ropinirole-HCl                 | 9.1   | 11.0  |
| <b>333</b> | Ribavirin                                                | 5.1  | 9.3   | <b>733</b> | Ropivacaine-HCl Monohydrate    | 14.5  | 8.3   |
| <b>334</b> | Nelfinavir Mesylate                                      | 3.0  | 2.1   | <b>734</b> | Rosuvastatin Calcium           | 9.4   | 7.2   |
| <b>335</b> | Rimantadine-HCl                                          | 3.4  | 3.3   | <b>735</b> | Rufinamide                     | 13.3  | 9.3   |
| <b>336</b> | Propranolol-HCl                                          | -0.9 | 2.3   | <b>736</b> | Saquinavir Mesylate            | 4.2   | 6.1   |
| <b>337</b> | Scopolamine-HBr                                          | -0.4 | 4.7   | <b>737</b> | Selegiline-HCl                 | 7.4   | 4.4   |
| <b>338</b> | Spironolactone                                           | 24.3 | 19.2  | <b>738</b> | Sertraline-HCl                 | -16.1 | -6.9  |
| <b>339</b> | Streptomycin Sulfate                                     | 6.9  | 7.4   | <b>739</b> | Silver Sulfadiazine            | 69.7  | 69.9  |

|     |                                            |       |       |     |                            |       |      |
|-----|--------------------------------------------|-------|-------|-----|----------------------------|-------|------|
| 340 | Sulfadiazine                               | 6.4   | 30.0  | 740 | Sitagliptin Phosphate      | 8.7   | 7.6  |
| 341 | Sulfasalazine                              | ND    | 8.2   | 741 | Sorafenib Tosylate         | 11.6  | 20.7 |
| 342 | Tamsulosin-HCl                             | ND    | 9.5   | 742 | Stavudine                  | 11.2  | 10.0 |
| 343 | Telmisartan                                | 2.6   | 7.1   | 743 | Streptozocin               | 10.0  | 13.7 |
| 344 | Terazosin-HCl                              | 6.6   | -8.4  | 744 | Sulconazole Nitrate        | -1.4  | -4.0 |
| 345 | Tetracycline                               | 5.7   | 6.1   | 745 | Sulfacetamide-Na           | 11.7  | 8.3  |
| 346 | Temozolomide                               | 4.3   | 4.3   | 746 | Sulfamethoxazole           | 9.5   | 4.5  |
| 347 | Tinidazole                                 | 9.2   | 7.2   | 747 | Sulfanilamide              | 8.3   | 8.4  |
| 348 | Tobramycin                                 | 1.1   | 8.3   | 748 | Sunitinib Malate           | 4.4   | 8.2  |
| 349 | Topotecan-HCl                              | 5.3   | 1.0   | 749 | Tacrolimus (Fk506)         | 10.2  | 5.0  |
| 350 | Toremifene Base                            | -2.8  | -7.4  | 750 | Tadalafil                  | 8.2   | -4.5 |
| 351 | Tolmetin sodium dihydrate                  | 15.0  | 12.1  | 751 | Tazarotene                 | 12.8  | 14.1 |
| 352 | Amoxicillin                                | ND    | 9.8   | 752 | Telbivudine                | 11.1  | 2.4  |
| 353 | Tramadol-HCl                               | -2.6  | -1.8  | 753 | Telithromycin              | 12.9  | 11.0 |
| 354 | Trimethoprim                               | 5.5   | 12.6  | 754 | Temazepam                  | 6.4   | 11.6 |
| 355 | Valacyclovir-HCl                           | 1.0   | 21.9  | 755 | Temsirolimus               | 8.7   | -0.3 |
| 356 | Vecuronium Bromide                         | 4.0   | 13.4  | 756 | Teniposide                 | 1.0   | 8.9  |
| 357 | Venlafaxine-HCl                            | 2.6   | 8.0   | 757 | Tenofovir                  | 10.1  | 8.9  |
| 358 | Bupivacaine-HCl                            | 9.4   | 2.1   | 758 | Terbutaline Hemisulfate    | 11.0  | 11.5 |
| 359 | Ketotifen Fumarate                         | 2.9   | 2.6   | 759 | Terconazole                | 6.4   | 9.8  |
| 360 | Naloxone-HCl                               | -12.5 | -12.7 | 760 | Testosterone Enanthate     | 15.0  | 5.5  |
| 361 | Fluoxetine-HCl                             | 1.7   | 4.1   | 761 | Tetrabenazine              | 12.4  | 11.9 |
| 362 | Ondansetron                                | 5.5   | 11.1  | 762 | Tetrahydrozoline-HCl       | 1.7   | 10.9 |
| 363 | Tiotropium Bromide                         | 16.2  | 6.6   | 763 | Theophylline               | 8.5   | 12.3 |
| 364 | Thioridazine-HCl                           | -6.5  | -7.3  | 764 | Thioguanine(6-Thioguanine) | 10.1  | 9.9  |
| 365 | Amrinone                                   | 7.0   | 6.0   | 765 | Thiotepa                   | -14.8 | 4.8  |
| 366 | Milrinone                                  | 5.0   | 9.8   | 766 | VEHICLE                    | -7.0  | -4.4 |
| 367 | Alprostadil                                | 5.9   | 5.5   | 767 | Tiagabine-HCl              | 6.7   | 5.8  |
| 368 | Misoprostol                                | 0.9   | 0.7   | 768 | Tigecycline                | 8.9   | 16.2 |
| 369 | Argatroban                                 | 6.9   | 9.9   | 769 | Tiludronate Disodium       | 5.0   | 7.3  |
| 370 | Cilastatin-Na                              | 5.5   | 2.5   | 770 | Tiopronin                  | -1.3  | 5.1  |
| 371 | Butoconazole Nitrate                       | 1.7   | -0.2  | 771 | Tirofiban-HCl              | 12.0  | 1.0  |
| 372 | Mifepristone                               | 3.8   | 7.0   | 772 | Tolterodine Tartrate       | 3.3   | 5.6  |
| 373 | Megestrol Acetate                          | 15.8  | 16.7  | 773 | Tolvaptan                  | 2.4   | 7.7  |
| 374 | Tamoxifen Citrate                          | -11.2 | -11.3 | 774 | Topiramate                 | 10.7  | 12.4 |
| 375 | Aprepitant                                 | -24.2 | -17.1 | 775 | Torseamide                 | 5.4   | 1.8  |
| 376 | Bosentan                                   | 3.5   | 3.1   | 776 | Trandolapril               | 2.9   | 12.8 |
| 377 | Efavirenz                                  | -7.5  | -2.6  | 777 | Travoprost                 | 7.8   | 7.9  |
| 378 | Miglustat (N-Butyldeoxynojirimycin-HCl)    | 6.3   | 7.0   | 778 | Trazodone-HCl              | 9.0   | 3.7  |
| 379 | Fulvestrant                                | 6.2   | 5.4   | 779 | Tretinoin                  | 11.5  | 7.3  |
| 380 | Esmolol                                    | 11.0  | 6.7   | 780 | Triamcinolone Acetonide    | 10.4  | 10.6 |
| 381 | Capecitabine                               | 8.2   | 3.6   | 781 | Triamterene                | 11.8  | 25.6 |
| 382 | Succinylcholine Chloride-2H <sub>2</sub> O | 8.9   | 4.2   | 782 | Triazolam                  | 12.7  | 11.6 |

|            |                                  |      |      |            |                           |       |       |
|------------|----------------------------------|------|------|------------|---------------------------|-------|-------|
| <b>383</b> | Cyproheptadine-HCl Sesquihydrate | -6.2 | -7.2 | <b>783</b> | Trientine Dihydrochloride | 9.4   | 2.8   |
| <b>384</b> | Abacavir Sulfate                 | 3.7  | 4.3  | <b>784</b> | Trihexyphenidyl-HCl       | 5.0   | 9.0   |
| <b>385</b> | Acamprosate                      | 8.1  | 4.2  | <b>785</b> | Trimethadione             | 9.1   | 10.3  |
| <b>386</b> | Acarbose                         | 4.0  | 10.1 | <b>786</b> | Trimethobenzamide-HCl     | 7.2   | 5.7   |
| <b>387</b> | Acebutolol-HCl                   | 7.6  | 7.4  | <b>787</b> | Trimipramine Maleate      | 9.0   | 24.3  |
| <b>388</b> | Acetaminophen                    | 2.7  | 2.4  | <b>788</b> | Tropium Chloride          | 6.4   | 11.7  |
| <b>389</b> | Acetazolamide                    | 8.0  | 6.6  | <b>789</b> | Ursodiol                  | 5.4   | 8.8   |
| <b>390</b> | Acetohexamide                    | 9.0  | 11.4 | <b>790</b> | Valganciclovir-HCl        | -3.8  | 0.9   |
| <b>391</b> | Acetohydroxamic Acid             | -0.3 | 5.3  | <b>791</b> | Valproate-Na              | -12.2 | -10.3 |
| <b>392</b> | Acetylcysteine                   | 9.3  | 8.2  | <b>792</b> | Valsartan                 | 4.0   | 11.8  |
| <b>393</b> | Acrivastine                      | 8.1  | 2.9  | <b>793</b> | Vancomycin-HCl            | 10.3  | 9.2   |
| <b>394</b> | Adefovir Dipivoxil               | 6.0  | 2.7  | <b>794</b> | Varenicline Tartrate      | -10.8 | -10.9 |
| <b>395</b> | Adenosine                        | 5.7  | 5.9  | <b>795</b> | Vigabatrin                | 10.9  | 7.0   |
| <b>396</b> | VEHICLE                          | -7.7 | -9.7 | <b>796</b> | Voriconazole              | 11.6  | 10.3  |
| <b>397</b> | Alitretinoin                     | -4.5 | 8.7  | <b>797</b> | Warfarin-Na               | 6.8   | 8.3   |
| <b>398</b> | Almotriptan                      | 6.1  | 1.1  | <b>798</b> | Zaleplon                  | 4.7   | 1.8   |
| <b>399</b> | Alosetron-HCl                    | 4.0  | 5.0  | <b>799</b> | Zanamivir                 | 7.4   | 5.2   |
| <b>400</b> | VEHICLE                          | -7.3 | -2.2 | <b>800</b> | Ziprasidone               | 39.7  | 34.7  |
